# Supplementary material for: Relationship of FDG Uptake of the Reticuloendothelial System with Tumor Immune Microenvironment and Prognosis in Patients with Gastric Cancer
Source: MDPI journal article supplement (doi:10.3390/life13030771), 2023-03-13
Supplement: s1 [file s1]

Article Title: **Relationship of FDG uptake of the reticuloendothelial system with tumor immune microenvironment and prognosis in patients with gastric cancer**

Authors: Hyein Ahn, Geum Jong Song, Moon-Soo Lee, Ji-Hye Lee, Si-Hyong Jang, Mee-Hye Oh, Jong Hyuk Yun, Sang Mi Lee, Jeong Won Lee

**Table S1.** Correlation analysis of FDG uptake of primary tumor lesion, BM, and spleen.

|            |                         | Tumor SUV     | BM SUV        | Spleen SUV     | BLR            | SLR           |
|------------|-------------------------|---------------|---------------|----------------|----------------|---------------|
| Tumor SUV  | Correlation coefficient | 1.00          | 0.402         | 0.296          | 0.374          | 0.474         |
|            | (95% CI)                |               | (0.184–0.582) | (0.066–0.497)  | (0.152–0.560)  | (0.268–0.638) |
|            | P-value                 | -             | <0.001        | 0.013          | 0.014          | <0.001        |
| BM SUV     | Correlation coefficient | 0.402         | 1.00          | 0.616          | 0.641          | 0.407         |
|            | (95% CI)                | (0.184–0.582) |               | (0.446–0.744)  | (0.513–0.731)  | (0.190–0.586) |
|            | P-value                 | <0.001        | -             | <0.001         | <0.001         | <0.001        |
| Spleen SUV | Correlation coefficient | 0.296         | 0.616         | 1.00           | 0.133          | 0.622         |
|            | (95% CI)                | (0.066–0.497) | (0.446–0.744) |                | (-0.105–0.357) | (0.437–0.774) |
|            | P-value                 | 0.013         | <0.001        | -              | 0.272          | <0.001        |
| BLR        | Correlation coefficient | 0.374         | 0.641         | 0.133          | 1.00           | 0.622         |
|            | (95% CI)                | (0.152–0.560) | (0.513–0.731) | (-0.105–0.357) |                | (0.437–0.774) |
|            | P-value                 | 0.014         | <0.001        | 0.272          | -              | <0.001        |
| SLR        | Correlation coefficient | 0.474         | 0.407         | 0.622          | 0.622          | 1.00          |
|            | (95% CI)                | (0.268–0.638) | (0.190–0.586) | (0.437–0.774)  | (0.437–0.774)  |               |
|            | P-value                 | <0.001        | <0.001        | <0.001         | <0.001         | -             |

BLR, bone marrow-to-liver uptake ratio; BM, bone marrow; CI, confidence interval; FDG, 2-deoxy-2-[<sup>18</sup>F]fluoro-

D-glucose; SLR, spleen-to-liver uptake ratio; SUV, standardized uptake value
